# Supplementary material for: Stepwise Reduction of Dietary Phosphorus in Diets for Piglets and Fattening Pigs of Different Genetic Origin Housed under Various Station Environments—A Ringtest
Source: MDPI journal article supplement (doi:10.3390/ani13111774), 2023-05-26
Supplement: s1 [file s1]

**Table S1.** Analyzed nutrient composition of the experimental diets during piglet phases 1 and 2 (88% DM).

|         | Body Weight | Phase P1   |        |        | Phase P2    |       |       |
|---------|-------------|------------|--------|--------|-------------|-------|-------|
|         |             | 8 to 15 kg |        |        | 15 to 28 kg |       |       |
|         |             | Treatment  | T1     | T2     | T1          | T1    | T2    |
| Ash     | (%)         | 6.01       | 5.18   | 5.18   | 5.64        | 5.45  | 5.30  |
| CP      | (%)         | 18.46      | 17.58  | 18.50  | 18.00       | 17.70 | 17.50 |
| CF      | (%)         | 3.55       | 3.32   | 3.24   | 3.36        | 3.50  | 3.50  |
| EE      | (%)         | 4.1        | 5.60   | 5.31   | 4.65        | 4.26  | 4.50  |
| XS      | (%)         | 40.73      | 40.46  | 40.31  | 41.82       | 42.50 | 42.20 |
| Lys     | (%)         | 1.38       | 1.14   | 1.22   | 1.22        | 1.11  | 1.25  |
| Met     | (%)         | 0.36       | 0.31   | 0.32   | 0.31        | 0.36  | 0.30  |
| Thr     | (%)         | 0.87       | 0.78   | 0.81   | 0.78        | 0.85  | 0.80  |
| Val     | (%)         | 0.89       | 0.79   | 0.78   | 0.79        | 0.82  | 0.80  |
| Ca      | (%)         | 0.90       | 0.83   | 0.75   | 0.91        | 0.83  | 0.81  |
| P       | (%)         | 0.53       | 0.52   | 0.51   | 0.56        | 0.53  | 0.50  |
| ME      | (MJ/kg)     |            |        |        |             | 13.58 | 13.60 |
| AD-     | (g/kg)      | 43.36      | 46.16  | 51.13  | k.A.        | k.A.  | k.A.  |
| aND-    | (g/kg)      | 116.28     | 130.63 | 133.72 | k.A.        | k.A.  | k.A.  |
| Phytase | (FTU/kg)    | 1300       | 1300   | 1390   | 1060        | 1390  | 1500  |

**Table S2.** Analyzed nutrient composition of the experimental diets during fattening phases F1 to F3 (88% DM).

|             |           | Phase F1    |       |      | Phase F2    |       |       | Phase F3     |       |       |
|-------------|-----------|-------------|-------|------|-------------|-------|-------|--------------|-------|-------|
| Body Weight |           | 28 to 60 kg |       |      | 60 to 90 kg |       |       | 90 to 120 kg |       |       |
|             | Treatment | T1          | T2    | T3   | T1          | T2    | T3    | T1           | T2    | T3    |
| Ash         | (%)       | 5.12        | 4.89  | 4.8  | 4.49        | 4.26  | 4.06  | 4.32         | 4.24  | 3.74  |
| CP          | (%)       | 17.48       | 17.86 | 17.5 | 15.96       | 15.76 | 15.06 | 14.58        | 14.25 | 14.35 |
| XL          | (%)       | 2.41        | 2.39  | 2.4  | 3.49        | 3.37  | 2.77  | 2.82         | 2.93  | 3.13  |
| XF          | (%)       | 3.32        | 3.39  | 3.2  | 3.09        | 3.27  | 3.37  | 3.52         | 3.84  | 3.44  |
| Starch      | (%)       | 44.20       | 43.50 | 44.1 | 47.19       | 46.87 | 46.08 | 47.57        | 47.99 | 49.51 |
| Lys         | (%)       | 1.20        | 1.27  | 1.2  | 0.95        | 0.92  | 0.97  | 0.87         | 0.98  | 0.89  |
| Met         | (%)       | 0.35        | 0.32  | 0.3  | 0.239       | 0.25  | 0.24  | 0.23         | 0.26  | 0.26  |
| Val         | (%)       | 0.78        | 0.81  | 0.8  | 0.65        | 0.67  | 0.68  | 0.66         | 0.71  | 0.63  |
| Thr         | (%)       | 0.81        | 0.82  | 0.78 | 0.67        | 0.63  | 0.64  | 0.61         | 0.66  | 0.64  |
| Na          | (%)       | 0.20        | 0.25  | 0.3  | 0.21        | 0.208 | 0.22  | 0.22         | 0.23  | 0.21  |
| Ca          | (%)       | 0.77        | 0.72  | 0.7  | 0.72        | 0.63  | 0.58  | 0.68         | 0.70  | 0.49  |
| P           | (%)       | 0.53        | 0.46  | 0.4  | 0.46        | 0.41  | 0.37  | 0.44         | 0.41  | 0.34  |
| ME          | (MJ/kg)   | 13.36       | 13.37 | 13.4 | 13.67       | 13.58 | 13.28 | 13.28        | 13.24 | 13.54 |
| AD-Fom      | (g/kg)    | 4.02        | 4.89  | 4.5  | 4.59        | 4.56  | 4.56  | 4.32         | 4.55  | 5.05  |
| aND-Fom     | (g/kg)    | 10.35       | 9.88  | 10.3 | 10.18       | 10.8  | 11.40 | 11.06        | 10.81 | 11.32 |
